# Supplementary material
Source: publisher figshare collection journal article supplement (https://sage.figshare.com/ndownloader/files/14256347)
Supplement: Supplementary file 1 [file 14256347]

| Appendix K  Audio Recording Data Sheet  Rater Scores & IOA | | | | | |
| --- | --- | --- | --- | --- | --- |
| Recording # | Final Rating | Rater 1 | Rater 2 | Rater 3 | Agreement |
|  | 1 2 3 4 | 1 2 3 4 | 1 2 3 4 | 1 2 3 4 | Yes No |
|  | 1 2 3 4 | 1 2 3 4 | 1 2 3 4 | 1 2 3 4 | Yes No |
|  | 1 2 3 4 | 1 2 3 4 | 1 2 3 4 | 1 2 3 4 | Yes No |
|  | 1 2 3 4 | 1 2 3 4 | 1 2 3 4 | 1 2 3 4 | Yes No |
|  | 1 2 3 4 | 1 2 3 4 | 1 2 3 4 | 1 2 3 4 | Yes No |
|  | 1 2 3 4 | 1 2 3 4 | 1 2 3 4 | 1 2 3 4 | Yes No |
|  | 1 2 3 4 | 1 2 3 4 | 1 2 3 4 | 1 2 3 4 | Yes No |
|  | 1 2 3 4 | 1 2 3 4 | 1 2 3 4 | 1 2 3 4 | Yes No |
|  | 1 2 3 4 | 1 2 3 4 | 1 2 3 4 | 1 2 3 4 | Yes No |
|  | 1 2 3 4 | 1 2 3 4 | 1 2 3 4 | 1 2 3 4 | Yes No |
|  | 1 2 3 4 | 1 2 3 4 | 1 2 3 4 | 1 2 3 4 | Yes No |
|  | 1 2 3 4 | 1 2 3 4 | 1 2 3 4 | 1 2 3 4 | Yes No |
|  | 1 2 3 4 | 1 2 3 4 | 1 2 3 4 | 1 2 3 4 | Yes No |
|  | 1 2 3 4 | 1 2 3 4 | 1 2 3 4 | 1 2 3 4 | Yes No |
|  | 1 2 3 4 | 1 2 3 4 | 1 2 3 4 | 1 2 3 4 | Yes No |
|  | 1 2 3 4 | 1 2 3 4 | 1 2 3 4 | 1 2 3 4 | Yes No |
|  | 1 2 3 4 | 1 2 3 4 | 1 2 3 4 | 1 2 3 4 | Yes No |
|  | 1 2 3 4 | 1 2 3 4 | 1 2 3 4 | 1 2 3 4 | Yes No |
|  | 1 2 3 4 | 1 2 3 4 | 1 2 3 4 | 1 2 3 4 | Yes No |
|  | 1 2 3 4 | 1 2 3 4 | 1 2 3 4 | 1 2 3 4 | Yes No |
|  | 1 2 3 4 | 1 2 3 4 | 1 2 3 4 | 1 2 3 4 | Yes No |
|  | 1 2 3 4 | 1 2 3 4 | 1 2 3 4 | 1 2 3 4 | Yes No |
|  | 1 2 3 4 | 1 2 3 4 | 1 2 3 4 | 1 2 3 4 | Yes No |
|  | 1 2 3 4 | 1 2 3 4 | 1 2 3 4 | 1 2 3 4 | Yes No |
|  | 1 2 3 4 | 1 2 3 4 | 1 2 3 4 | 1 2 3 4 | Yes No |
|  | 1 2 3 4 | 1 2 3 4 | 1 2 3 4 | 1 2 3 4 | Yes No |
|  | 1 2 3 4 | 1 2 3 4 | 1 2 3 4 | 1 2 3 4 | Yes No |
|  | 1 2 3 4 | 1 2 3 4 | 1 2 3 4 | 1 2 3 4 | Yes No |
|  | 1 2 3 4 | 1 2 3 4 | 1 2 3 4 | 1 2 3 4 | Yes No |
|  | 1 2 3 4 | 1 2 3 4 | 1 2 3 4 | 1 2 3 4 | Yes No |
|  | 1 2 3 4 | 1 2 3 4 | 1 2 3 4 | 1 2 3 4 | Yes No |
|  | 1 2 3 4 | 1 2 3 4 | 1 2 3 4 | 1 2 3 4 | Yes No |
|  | 1 2 3 4 | 1 2 3 4 | 1 2 3 4 | 1 2 3 4 | Yes No |
|  | 1 2 3 4 | 1 2 3 4 | 1 2 3 4 | 1 2 3 4 | Yes No |
|  | 1 2 3 4 | 1 2 3 4 | 1 2 3 4 | 1 2 3 4 | Yes No |
|  | 1 2 3 4 | 1 2 3 4 | 1 2 3 4 | 1 2 3 4 | Yes No |
|  | 1 2 3 4 | 1 2 3 4 | 1 2 3 4 | 1 2 3 4 | Yes No |
|  | 1 2 3 4 | 1 2 3 4 | 1 2 3 4 | 1 2 3 4 | Yes No |
|  | 1 2 3 4 | 1 2 3 4 | 1 2 3 4 | 1 2 3 4 | Yes No |
|  | 1 2 3 4 | 1 2 3 4 | 1 2 3 4 | 1 2 3 4 | Yes No |
|  | 1 2 3 4 | 1 2 3 4 | 1 2 3 4 | 1 2 3 4 | Yes No |
|  | 1 2 3 4 | 1 2 3 4 | 1 2 3 4 | 1 2 3 4 | Yes No |
|  | 1 2 3 4 | 1 2 3 4 | 1 2 3 4 | 1 2 3 4 | Yes No |
|  | 1 2 3 4 | 1 2 3 4 | 1 2 3 4 | 1 2 3 4 | Yes No |
|  | 1 2 3 4 | 1 2 3 4 | 1 2 3 4 | 1 2 3 4 | Yes No |
|  | 1 2 3 4 | 1 2 3 4 | 1 2 3 4 | 1 2 3 4 | Yes No |
|  | 1 2 3 4 | 1 2 3 4 | 1 2 3 4 | 1 2 3 4 | Yes No |
|  | 1 2 3 4 | 1 2 3 4 | 1 2 3 4 | 1 2 3 4 | Yes No |
|  | 1 2 3 4 | 1 2 3 4 | 1 2 3 4 | 1 2 3 4 | Yes No |
|  | 1 2 3 4 | 1 2 3 4 | 1 2 3 4 | 1 2 3 4 | Yes No |
|  | 1 2 3 4 | 1 2 3 4 | 1 2 3 4 | 1 2 3 4 | Yes No |
|  | 1 2 3 4 | 1 2 3 4 | 1 2 3 4 | 1 2 3 4 | Yes No |
|  | 1 2 3 4 | 1 2 3 4 | 1 2 3 4 | 1 2 3 4 | Yes No |
|  | 1 2 3 4 | 1 2 3 4 | 1 2 3 4 | 1 2 3 4 | Yes No |
|  | 1 2 3 4 | 1 2 3 4 | 1 2 3 4 | 1 2 3 4 | Yes No |
|  | 1 2 3 4 | 1 2 3 4 | 1 2 3 4 | 1 2 3 4 | Yes No |
|  | 1 2 3 4 | 1 2 3 4 | 1 2 3 4 | 1 2 3 4 | Yes No |
|  | 1 2 3 4 | 1 2 3 4 | 1 2 3 4 | 1 2 3 4 | Yes No |
|  | 1 2 3 4 | 1 2 3 4 | 1 2 3 4 | 1 2 3 4 | Yes No |
|  | 1 2 3 4 | 1 2 3 4 | 1 2 3 4 | 1 2 3 4 | Yes No |
|  | 1 2 3 4 | 1 2 3 4 | 1 2 3 4 | 1 2 3 4 | Yes No |
|  | 1 2 3 4 | 1 2 3 4 | 1 2 3 4 | 1 2 3 4 | Yes No |
|  | 1 2 3 4 | 1 2 3 4 | 1 2 3 4 | 1 2 3 4 | Yes No |
|  | 1 2 3 4 | 1 2 3 4 | 1 2 3 4 | 1 2 3 4 | Yes No |
|  | 1 2 3 4 | 1 2 3 4 | 1 2 3 4 | 1 2 3 4 | Yes No |
|  | 1 2 3 4 | 1 2 3 4 | 1 2 3 4 | 1 2 3 4 | Yes No |
|  | 1 2 3 4 | 1 2 3 4 | 1 2 3 4 | 1 2 3 4 | Yes No |
|  | 1 2 3 4 | 1 2 3 4 | 1 2 3 4 | 1 2 3 4 | Yes No |
|  | 1 2 3 4 | 1 2 3 4 | 1 2 3 4 | 1 2 3 4 | Yes No |

Guidelines for Final Rating Decisions

1. Two raters will rate each recording
2. If there is disagreement between the two raters a third rater will rate the recording
3. If two of the three raters agree, the majority decision will hold.
4. If the there is no agreement among the three raters, retraining will occur and the disputed recording will be re-scored.
5. If the percentage of disagreements reaches 10% of the scored recordings, additional retraining will occur.

Recordings Assessed using Adapted NAEP oral fluency scale IOA;

IOA = _____ / (____ + ____) x 100 = ______%

Agree / Agree + Disagree
